# Supplementary material for: Biotransformation and in Vitro Metabolic Profile of Bioactive Extracts from a Traditional Miao-Nationality Herbal Medicine, Polygonum capitatum
Source: PubMed Central journal article supplement (PMC6270779; doi:10.3390/molecules190710291), 2014-07-16

## Supplementary Information

**Figure S1.** HPLC chromatogram of metabolites in the incubation of extracts of *P. capitatum* in the intestinal bacteria *in vitro* (a) HPLC of metabolites of EtOAc fraction; (b): HPLC of metabolites of ethanol extracts; —: incubation for 24 h; ----: negative control for 24 h; - - - -: incubation for 0 h.

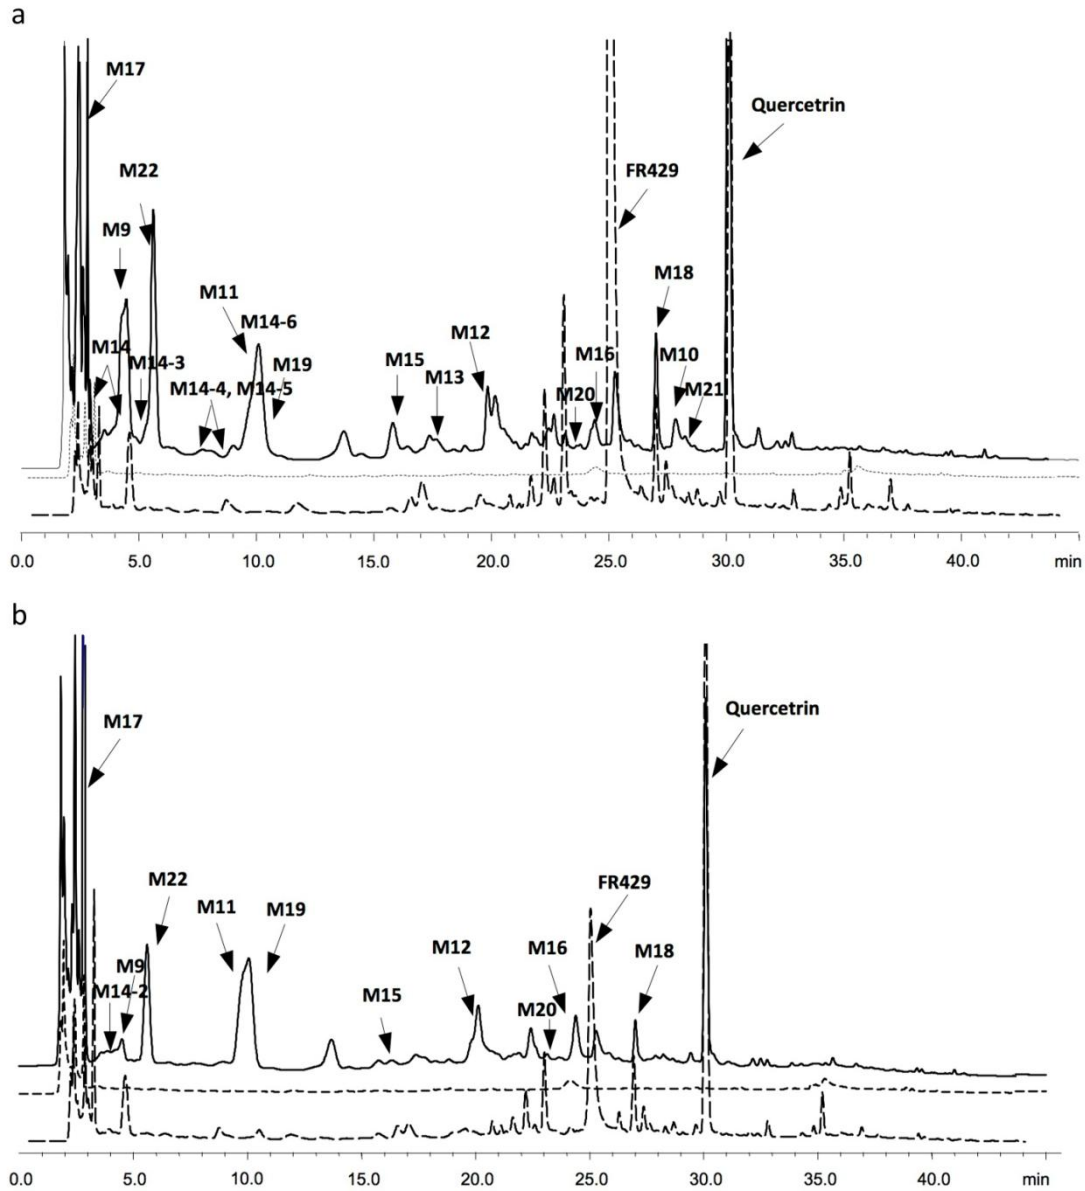

Supplement: molecules-19-10291-s001.pdf [file molecules-19-10291-s001.pdf]
